# Supplementary material
Source: PubMed Central journal article supplement (PMC4004315)
Supplement: nn406302j_si_001.pdf [file nn406302j_si_001.pdf]

## SUPPORTING INFORMATION

### Title

**Dynamic Magnetic Fields Remote Control Apoptosis *Via* Nanoparticle Rotation**

### Authors

Enming Zhang<sup>1\*#</sup>, Moritz F. Kircher<sup>2-4#</sup>, Martin Koch<sup>5</sup>, Lena Eliasson<sup>1</sup>, S. Nahum Goldberg<sup>6,7</sup>,  
Erik Renström<sup>1\*</sup>,

1) Department of Clinical Sciences Malmö, Lund University, Sweden;

2) Department of Radiology, Memorial Sloan-Kettering Cancer Center, New York, USA;

3) Department of Radiology, Weill Cornell Medical College, New York, NY, USA;

4) Center for Molecular Imaging and Nanotechnology, Memorial Sloan-Kettering Cancer  
Center, New York, USA;

5) Stetter Elektronik, Seeheim-Jugenheim, Germany;

6) Laboratory for Minimally Invasive Tumor Therapies, Department of Radiology, Beth Israel  
Deaconess Medical Center/Harvard Medical School, Boston, MA, USA;

7) Division of Image-guided Therapy and Interventional Oncology, Department of Radiology,  
Hadassah Hebrew University Medical Center, Jerusalem, Israel

\*Address correspondence to Erik Renström, [erik.renstrom@med.lu.se](mailto:erik.renstrom@med.lu.se) or Enming Zhang,  
[enming.zhang@med.lu.se](mailto:enming.zhang@med.lu.se).

<sup>#</sup>These authors contributed equally to this work

**Movie 1:** Illustrates the rotational control of magnetic microparticles achieved with the DMF device. The control of 500-nm particle rotation in Krebs buffer was done using 5-15 Hz DMF.

**Movie 2:** Illustrates the rotational control of magnetic nanoparticles achieved with the DMF device. The control of 300-nm particle rotating in Krebs buffer was done by 5-15 Hz DMF.

**Movie 3:** Dynamic confocal microscopy study illustrating the real-time destruction of lysosomes via DMF and LAMP1-SPIONs. The movie was taken by confocal microscopy with three channels: channel 1, LysoTracker®Green DND-26 fluorescence (green, acidotropic probe to indicate lysosomes) the intensity of which dropped down immediately after DM treatment; channel 2, (red) which indicates 100-nm SPIONs in lysosomes and channel 3, which shows translucent light.
